# Supplementary material
Source: publisher figshare collection journal article supplement (https://tandf.figshare.com/ndownloader/files/18765662)
Supplement: Supplementary file 1 [file 18765662]

**Supplementary methods**

Our sample estimate of *Pesquet’s Parrot per person* was extrapolated for Kerowagi District by defining the number of *Pesquet’s parrot in Kerowagi* (***K***) for each of the 100,000 bootstrap estimates (***i***) as:

Where:

**K =** *Pesquet’s parrot in Kerowagi*

**N =** total population of Kerowagi (National Statistics Office 2014)

**A =** proportion of adults in Kerowagi

**H =** the proportion of adults owning headdresses with Pesquet Parrot feathers

**=** estimate of*Pesquet’s Parrot per person*

Thereafter we calculated the bootstrap percentile confidence intervals and mean number of *Pesquet’s parrot in Kerowagi.*
